# Supplementary material
Source: PubMed Central journal article supplement (PMC2901685)
Supplement: supp_192_12_3159__1.pdf [file supp_192_12_3159__1.pdf]

## **Supporting information for Mo and Burkholder (2010)**

### **Tables**

**Table S1. Plasmids used in this study.**

**Table S2. Oligonucleotides used in this study.**

### **Figures**

**Figure S1. Cells overexpressing *yneA* cease exponential growth at the same time as uninduced cells.**

**Figure S2. YneA-S-flag-His10 is partially functional.**

### **References**

**Table S1. Plasmids used in this study.**

|             |                                                                                                                                                                                                                                                                                                                                                                                                                                                         |
|-------------|---------------------------------------------------------------------------------------------------------------------------------------------------------------------------------------------------------------------------------------------------------------------------------------------------------------------------------------------------------------------------------------------------------------------------------------------------------|
| pCRII-TOPO  | Vector for TOPO cloning; Kan <sup>R</sup> , Amp <sup>R</sup> (Invitrogen).                                                                                                                                                                                                                                                                                                                                                                              |
| pCR2.1-TOPO | Vector for TOPO cloning; Kan <sup>R</sup> , Amp <sup>R</sup> (Invitrogen).                                                                                                                                                                                                                                                                                                                                                                              |
| pDG1662     | <i>amyE:: (cat);</i> Amp <sup>R</sup> , Spc <sup>R</sup> , Cm <sup>R</sup> (2)<br><br><i>amyE</i> integration plasmid.                                                                                                                                                                                                                                                                                                                                  |
| pDR111      | <i>amyE:: (spc P<sub>spank(hy)</sub>, lacI);</i> Amp <sup>R</sup> , Spc <sup>R</sup><br><br>Kindly provided by David Rudner (unpublished) – pDR111 is a derivative of the P <sub>spac-hy</sub> plasmid pJQ43 (3) and contains a second <i>lacO</i> operator site, bound by Lac repressor, to achieve better repression in the absence of the inducer IPTG.                                                                                              |
| pGEM-CAT    | Plasmid containing <i>cat</i> cassette; Cm <sup>R</sup> , Amp <sup>R</sup> (4)                                                                                                                                                                                                                                                                                                                                                                          |
| pRDC19      | <i>thrC:: (erm xylR P<sub>xyl</sub>);</i> Amp <sup>R</sup> , Spc <sup>R</sup> , Erm <sup>R</sup> (1)                                                                                                                                                                                                                                                                                                                                                    |
| pSB243      | pBluescript II SK- derived plasmid containing <i>erm</i> cassette; Erm <sup>R</sup> , Amp <sup>R</sup> (S.J. Biller, unpublished).                                                                                                                                                                                                                                                                                                                      |
| pAM45       | pDR111-derived plasmid expressing <i>yneA</i> from the P <sub>spank(hy)</sub> promoter.<br><br>The <i>yneA</i> ribosome binding site and open reading frame were amplified by PCR from JH642 genomic DNA using oligonucleotides OAM63 and OAM64 and inserted into pDR111 after digestion of both plasmid and insert with HindIII and SphI.                                                                                                              |
| pAM67       | pDG1662-derived plasmid expressing <i>yneA</i> from the P <sub>spank(hy)</sub> promoter.<br><br>A (P <sub>spank(hy)</sub> - <i>yneA lacI</i> )-containing DNA fragment was obtained by digesting pAM45 with EcoRI and BamHI and ligated into pDG1662, digested with the same enzymes.                                                                                                                                                                   |
| pAM72       | <i>thrC:: (erm P<sub>spank(hy)</sub> lacI);</i> Amp <sup>R</sup> , Spc <sup>R</sup> , Erm <sup>R</sup> – Derivative of pRDC19 carrying the P <sub>spank(hy)</sub> promoter instead of P <sub>xyl</sub> .<br><br>A (P <sub>spank(hy)</sub> - <i>lacI</i> )-containing DNA fragment was obtained by digesting pDR111 with EcoRI and BamHI and ligated to the pRDC19 backbone, digested with the same enzymes to drop out ( <i>xylR P<sub>xyl</sub></i> ). |

|        |                                                                                                                                                                                                                                                                                                                                                                                                                                                                                                                                                                                                                                                                                                                                                                                                                                                                                                                                                                                                                                                                                                                    |
|--------|--------------------------------------------------------------------------------------------------------------------------------------------------------------------------------------------------------------------------------------------------------------------------------------------------------------------------------------------------------------------------------------------------------------------------------------------------------------------------------------------------------------------------------------------------------------------------------------------------------------------------------------------------------------------------------------------------------------------------------------------------------------------------------------------------------------------------------------------------------------------------------------------------------------------------------------------------------------------------------------------------------------------------------------------------------------------------------------------------------------------|
| pAM73  | <p>pRDC19-derived plasmid expressing <i>yneA-phoA</i> from the <math>P_{spank(hy)}</math> promoter.</p> <p>Leaderless '<i>phoA</i> (without signal peptide) was amplified by PCR from <i>E. coli</i> N99 genomic DNA using oligonucleotides OAM76 and OAM77 and cloned into pCRII-TOPO using the TOPO-TA kit (Invitrogen). '<i>phoA</i> was then digested out of pCRII-TOPO with HindIII and BamHI and ligated into pRDC19, digested with the same enzymes, resulting in pAM68 (cloning intermediate not listed in this table). The <i>yneA</i> ribosome binding site and open reading frame was amplified by PCR from JH642 genomic DNA using oligonucleotides OAM63 and OAM78 and cloned into pCRII-TOPO using the TOPO-TA kit (Invitrogen). <i>yneA</i> was then digested out of pCRII-TOPO with HindIII and NotI and cloned into pAM68, digested with the same enzymes, resulting in pAM70 (cloning intermediate not listed in this table). <i>yneA</i>-'<i>phoA</i>-containing DNA fragment was obtained by digesting pAM70 using HindIII and SpeI and ligated into pAM72 digested with HindIII and NheI.</p> |
| pAM148 | <p>pRDC19-derived plasmid expressing <i>yneA-S-flag-His10</i> from the <math>P_{spank(hy)}</math> promoter.</p> <p>A multi-cloning site following by the coding sequence for the FLAG epitope tag (MCS-<i>flag</i>) was generated by annealing oligonucleotides OAM123 and OAM124 and ligating into pAM73 digested with NotI and SphI, dropping out '<i>phoA</i>, resulting in pAM99 (cloning intermediate not listed in this table). The coding sequence for a his<sub>10</sub> epitope tag was introduced by annealing oligonucleotides OAM156 and OAM157 and ligating into pAM99 digested with SpeI and SphI, resulting in pAM118 (cloning intermediate not listed in this table). The coding sequence for the S epitope tag was introduced by annealing oligonucleotides OAM225 and OAM226 and ligating into pAM118 digested with AsiSI and NheI.</p>                                                                                                                                                                                                                                                          |
| pAM157 | <p>Vector for integrating <i>yneA-S-flag-His10</i> by single crossover at the <i>yneA</i> locus.</p> <p>'<i>yneA</i> (starting at bp 31)-<i>S-flag-His10</i> amplified by PCR from pAM148 using oligonucleotides OAM232 and OAM233 and ligated into pSB243 and digestion of both plasmid and insert with HindIII and XhoI.</p>                                                                                                                                                                                                                                                                                                                                                                                                                                                                                                                                                                                                                                                                                                                                                                                     |
| pAM160 | <p>Vector for integrating <i>lytE</i>-'<i>phoA</i> by single crossover at the <i>lytE</i> locus.</p> <p>Leaderless '<i>phoA</i> (without signal peptide) was amplified by PCR</p>                                                                                                                                                                                                                                                                                                                                                                                                                                                                                                                                                                                                                                                                                                                                                                                                                                                                                                                                  |

from *E. coli* N99 genomic DNA using oligonucleotides OAM73 and OAM74 and cloned into pCR2.1-TOPO using the TOPO-TA kit (Invitrogen). '*phoA*' was then digested out of pCR2.1-TOPO with *Sall* and *NheI* and ligated into pGEM-CAT, digested with *Sall* and *XbaI*, resulting in pAM158 (cloning intermediate not listed in this table). '*lytE*' (starting from bp 519) was amplified by PCR from JH642 genomic DNA using oligonucleotides OAM231 and OAM222 and inserted into pAM158 after digestion of both plasmid and insert with *HindIII* and *Sall*.

pAM45-, pAM73-, and pAM148-derived plasmids expressing mutant alleles of *yneA*, *yneA-phoA*, or *yneA-S-flag-His10* from the  $P_{spank(hy)}$  promoter, respectively, were made using a Quikchange site-directed mutagenesis kit (Stratagene) and the oligonucleotides indicated.

| Plasmid     |                  |                          | Mutation     | Oligonucleotides  |
|-------------|------------------|--------------------------|--------------|-------------------|
| <i>yneA</i> | <i>yneA-phoA</i> | <i>yneA-S-flag-His10</i> |              |                   |
| pAM89       |                  | pAM150                   | SSGQ to ASAA | OAM113 and OAM114 |
| pAM115      |                  | pAM166                   | D97A         | OAM150 and OAM151 |
| pAM129      | pAM133           |                          | E6A          | OAM166 and OAM167 |
| pAM162      | pAM184           |                          | L25A         | OAM204 and OAM205 |
| pAM163      |                  |                          | S26A         | OAM206 and OAM207 |
| pAM169      | pAM185           |                          | S7A          | OAM172 and OAM173 |
| pAM170      | pAM186           |                          | I8A          | OAM174 and OAM175 |
| pAM171      |                  |                          | I9A          | OAM176 and OAM177 |
| pAM172      | pAM188           |                          | F10A         | OAM178 and OAM179 |
| pAM173      |                  |                          | V11A         | OAM180 and OAM181 |
| pAM174      | pAM190           |                          | L13A         | OAM182 and OAM183 |
| pAM175      | pAM191           |                          | F14A         | OAM184 and OAM185 |
| pAM176      | pAM192           | pAM199                   | T15A         | OAM186 and OAM187 |
| pAM177      |                  |                          | V16A         | OAM188 and OAM189 |
| pAM178      | pAM193           |                          | I17A         | OAM190 and OAM191 |
| pAM180      | pAM194           |                          | S19A         | OAM194 and OAM195 |
| pAM181      | pAM195           | pAM200                   | V21A         | OAM196 and OAM197 |
| pAM182      | pAM196           |                          | I22A         | OAM198 and OAM199 |
| pAM183      | pAM197           |                          | L23A         | OAM200 and OAM201 |

**Table S2. Oligonucleotides used in this study.**

| Primer | Sequence                                                        |
|--------|-----------------------------------------------------------------|
| OAM63  | 5'-GCGAAGCTTATGCGAACAAACATTCCTGTTG-3'                           |
| OAM64  | 5'-GCGGCATGCCTATCTTACAGTTGCTAATTC-3'                            |
| OAM73  | 5'-GCGGTCGACCCTGTTCTGGAAAACCGG-3'                               |
| OAM74  | 5'-GCGGCTAGCTTATTTTCAGCCCCAGAGCGGCTTTC-3'                       |
| OAM76  | 5'-GCCATCAAGCTTGCGGCCGCTCCTGTTCTGGAAAACCGGG-3'                  |
| OAM77  | 5'-CGCATTGGTCGACTTATTTTCAGCCCCAGAGCGG-3'                        |
| OAM78  | 5'-CGCATGTGCGGCCGCTCTTACAGTTGCTAATTC-3'                         |
| OAM113 | 5'-GTCATATACAGCCAGCGCCGCAGAGCTTAATC-3'                          |
| OAM114 | 5'-GATTAAGCTCTGCGGCGCTGGCTGTATATGAC-3'                          |
| OAM123 | 5'-GGCCGCAGGCGATCGCGCTAGCGATTATAAAGATGACGATGACAAAAGTAGTGCATG-3' |
| OAM124 | 5'-CACTAGTTTTGTATCGTCATCTTTATAATCGCTAGCGCGATCGCCTGC-3'          |
| OAM150 | 5'-GAAAAAGAAGCATCAGGCTGCATATGAATTAG-3'                          |
| OAM151 | 5'-CTAATTCATATGCAGCCTGATGCTTCTTTTTC-3'                          |
| OAM156 | 5'-CTAGTCATCACCATCACCATCACCATCACCATCACTAGGCAATG-3'              |
| OAM157 | 5'-CCTAGTGATGGTGATGGTGATGGTGATGGTGATGA-3'                       |
| OAM166 | 5'-CATGAGTAAAGCATCTATTATTTTGTGTC-3'                             |
| OAM167 | 5'-GACAAAAATAATAGATGCTTTACTCATG-3'                              |
| OAM172 | 5'-CATGAGTAAAGAAGCTATTATTTTGTGTCG-3'                            |
| OAM173 | 5'-CGACAAAAATAATAGCTTCTTTACTCATG-3'                             |
| OAM174 | 5'-GAGTAAAGAATCTGCTATTTTGTGTCGG-3'                              |
| OAM175 | 5'-CCGACAAAAATAGCAGATTCTTTACTC-3'                               |
| OAM176 | 5'-GTAAAGAATCTATTGCTTTTGTGCGGTCTG-3'                            |
| OAM177 | 5'-CAGACCGACAAAAGCAATAGATTCTTTAC-3'                             |
| OAM178 | 5'-GAATCTATTATTGCTGTGCGGTCTGTTTAC-3'                            |
| OAM179 | 5'-GTAAACAGACCGACAGCAATAATAGATTC-3'                             |
| OAM180 | 5'-CTATTATTTTGTCCGGTCTGTTTAC-3'                                 |
| OAM181 | 5'-GTAAACAGACCGGCAAAAATAATAG-3'                                 |
| OAM182 | 5'-CTATTATTTTGTGCGGTGCGTTTACAGTG-3'                             |
| OAM183 | 5'-CACTGTAAACGCACCGACAAAAATAATAG-3'                             |
| OAM184 | 5'-GTCGGTCTGGCTACAGTGATTTTG-3'                                  |
| OAM185 | 5'-CAAAATCACTGTAGCCAGACCGAC-3'                                  |
| OAM186 | 5'-CGGTCTGTTTGCAGTGATTTTGAGC-3'                                 |
| OAM187 | 5'-GCTCAAAATCACTGCAAACAGACCG-3'                                 |
| OAM188 | 5'-GGTCTGTTTACAGCGATTTTGAGCGCG-3'                               |
| OAM189 | 5'-CGCGCTCAAAATCGCTGTAAACAGACC-3'                               |
| OAM190 | 5'-CTGTTTACAGTGGCTTTGAGCGCGG-3'                                 |
| OAM191 | 5'-CCGCGCTCAAAGCCACTGTAAACAG-3'                                 |
| OAM194 | 5'-CAGTGATTTTGGCCGCGGTTATCCTTATG-3'                             |
| OAM195 | 5'-CATAAGGATAACCGCGGCCAAAATCACTG-3'                             |

OAM196 5'-GATTTTGAGCGCGGCTATCCTTATGCTG-3'  
OAM197 5'-CAGCATAAGGATAGCCGCGCTCAAATC-3'  
OAM198 5'-GAGCGCGGTTGCCCTTATGCTGTC-3'  
OAM199 5'-GACAGCATAAGGGCAACCGCGCTC-3'  
OAM200 5'-GCGCGGTTATCGCTATGCTGTTCATATAC-3'  
OAM201 5'-GTATATGACAGCATAGCGATAACCGCGC-3'  
OAM204 5'-GTTATCCTTATGGCGTCATATAACAAGC-3'  
OAM205 5'-GCTTGTATATGACGCCATAAGGATAAC-3'  
OAM206 5'-CCTTATGCTGGCATATAACAAGCAGC-3'  
OAM207 5'-GCTGCTTGTATATGCCAGCATAAAG-3'  
OAM222 5'-GCGGCTAGCGTCGACGAATCTTTTCGCACCGAGGTAAC-3'  
OAM225 5'-CGCAAGGAGACTGCTGCAGCAAAATTCGAGAGACAACATA  
TGGACTCTG-3'  
OAM226 5'-CTAGAGAGTCCATATGTTGTCTCTCGAATTTTGCTGCAGCA  
GTCTCCTGCGAT-3'  
OAM231 5'-GCGAAGCTTAAACGGCTTAAAATCAG-3'  
OAM232 5'-GCGAAGCTTGTCGGTCTGTTTACAGTGATTTTG-3'  
OAM233 5'-CGCCTCGAGCTAGTGATGGTGATGGTGATG-3'

Restriction sites used for cloning are underlined.

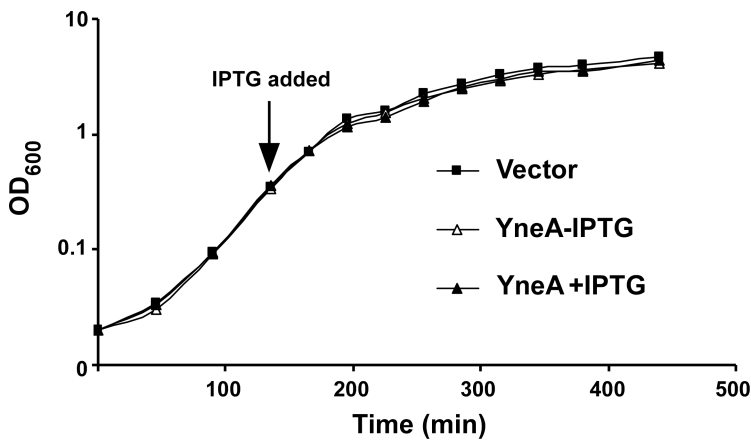

**Fig. S1. Cells overexpressing *yneA* cease exponential growth at the same time as uninduced and vector control cells.**

Overnight cultures of AM62 (*amyE::cat*) and AM93 (*amyE::P<sub>spank(hy)</sub>-yneA*) were diluted back to OD<sub>600</sub> ~ 0.02, grown at 37 °C in LB to exponential phase (OD<sub>600</sub> = 0.3-0.5), and induced with 1 mM IPTG (time of addition indicated by arrow on graph). Cell density was measured at the time points indicated.

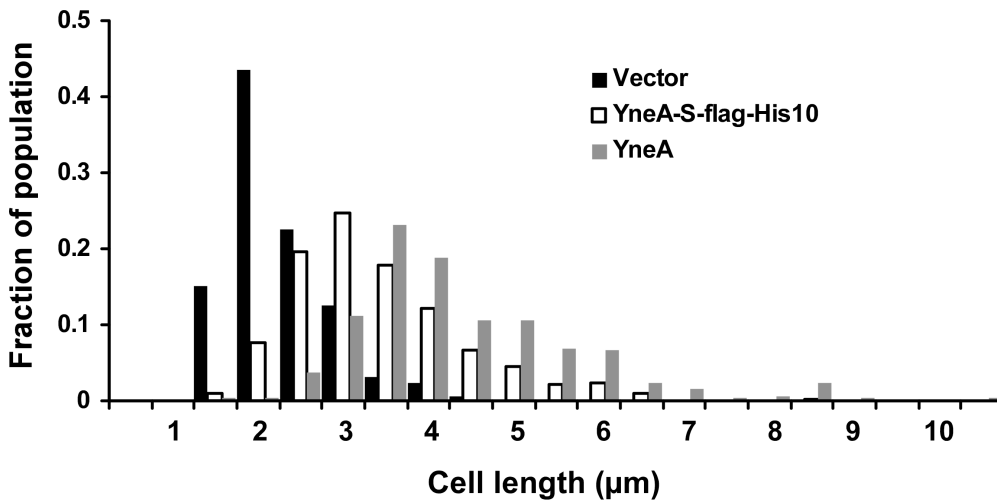

**Fig. S2. YneA-S-flag-His10 is partially functional.**

Overnight cultures of AM93 (*amyE::P<sub>spank(hy)</sub>-yneA*), AM199 (*thrC::P<sub>spank(hy)</sub>-yneA-S-flag-His10*), and AM206 (*thrC::erm*) were diluted back to OD<sub>600</sub> ~ 0.02, grown at 37 °C in LB to exponential phase (OD<sub>600</sub> = 0.3-0.5), and induced with 1 mM IPTG. 2 hours after induction of *yneA-S-flag-His10*, cells were stained with FM4-64 and DAPI and visualized. Cells lengths were quantified for at least 300 cells for each strain.

## References.

1. **Arigoni, F., F. Talabot, M. Peitsch, M. D. Edgerton, E. Meldrum, E. Allet, R. Fish, T. Jamotte, M. L. Curchod, and H. Loferer.** 1998. A genome-based approach for the identification of essential bacterial genes. *Nat Biotechnol* **16**:851-856.
2. **Guerout-Fleury, A. M., N. Frandsen, and P. Stragier.** 1996. Plasmids for ectopic integration in *Bacillus subtilis*. *Gene* **180**:57-61.
3. **Quisel, J. D., W. F. Burkholder, and A. D. Grossman.** 2001. *In vivo* effects of sporulation kinases on mutant Spo0A proteins in *Bacillus subtilis*. *J Bacteriol* **183**:6573-6578.
4. **Youngman, P.** 1990. Use of transposons and integrational vectors for mutagenesis and construction of gene fusions in *Bacillus* species, p. 221-226. *In* C. R. Harwood and S. M. Cutting (ed.), *Molecular biological methods for Bacillus*. John Wiley & Sons, Chichester.
